# Supplementary material for: Immigrant child health in Canada: a scoping review
Source: PubMed Central journal article supplement — BMJ Glob Health. 2022 Apr 14;7(4):e008189. doi: 10.1136/bmjgh-2021-008189 (PMC9014022; doi:10.1136/bmjgh-2021-008189), 2022-04-14
Supplement: bmjgh-2021-008189supp001.pdf [file bmjgh-2021-008189supp001.pdf]

**Online supplemental file 1: search strategy**

| <b>PubMed</b>                                            |                                                                                                                                                                                                                                                                                                                                                                                                                                                                                                                                                                                                                                     |
|----------------------------------------------------------|-------------------------------------------------------------------------------------------------------------------------------------------------------------------------------------------------------------------------------------------------------------------------------------------------------------------------------------------------------------------------------------------------------------------------------------------------------------------------------------------------------------------------------------------------------------------------------------------------------------------------------------|
| LIMITERS:                                                |                                                                                                                                                                                                                                                                                                                                                                                                                                                                                                                                                                                                                                     |
| <ul style="list-style-type: none"> <li>• None</li> </ul> |                                                                                                                                                                                                                                                                                                                                                                                                                                                                                                                                                                                                                                     |
| #                                                        | Query                                                                                                                                                                                                                                                                                                                                                                                                                                                                                                                                                                                                                               |
| 1.                                                       | Emigrants and Immigrants[MeSH Terms] OR Refugees[MeSH Terms]                                                                                                                                                                                                                                                                                                                                                                                                                                                                                                                                                                        |
| 2.                                                       | immigrant*[tiab] OR immigration[tiab] OR emigrant*[tiab] OR emigration[tiab] OR refugee*[tiab] OR asylum seeker*[tiab] OR asylee*[tiab] OR displaced[tiab] OR displacement[tiab] OR transient*[tiab] OR incomer*[tiab] OR "new comer*[tiab] OR newcomer*[tiab] OR migrant*[tiab] OR settler* OR resettler*[tiab]                                                                                                                                                                                                                                                                                                                    |
| 3.                                                       | #1 OR #2                                                                                                                                                                                                                                                                                                                                                                                                                                                                                                                                                                                                                            |
| 4.                                                       | Infant[MeSH Terms] OR Child[MeSH Terms] OR Child, Abandoned[MeSH Terms] OR Child, Adopted[MeSH Terms] OR child, Exceptional[MeSH Terms] OR Child, Foster[MeSH Terms] OR Child, Orphaned[MeSH Terms] OR Child, Unwanted[MeSH Terms] OR Adolescent[MeSH Terms] OR Minors[MeSH Terms]                                                                                                                                                                                                                                                                                                                                                  |
| 5.                                                       | pediatric*[tiab] OR paediatric*[tiab] OR child*[tiab] OR newborn*[tiab] OR infan*[tiab] OR baby[tiab] OR babies[tiab] OR neonat*[tiab] OR pre-term[tiab] OR preterm*[tiab] OR "premature birth*[tiab] OR NICU[tiab] OR preschool*[tiab] OR pre-school*[tiab] OR kindergarten*[tiab] OR kindergarden*[tiab] OR "elementary school*[tiab] OR "nursery school*[tiab] OR schoolchild*[tiab] OR toddler*[tiab] OR boy[tiab] OR boys[tiab] OR girl*[tiab] OR "middle school*[tiab] OR pubescen*[tiab] OR juvenile*[tiab] OR teen*[tiab] OR youth*[tiab] OR "high school*[tiab] OR adolesc*[tiab] OR pre-pubesc*[tiab] OR prepubesc*[tiab] |
| 6.                                                       | #4 OR #5                                                                                                                                                                                                                                                                                                                                                                                                                                                                                                                                                                                                                            |
| 7.                                                       | Health[MeSH Terms]                                                                                                                                                                                                                                                                                                                                                                                                                                                                                                                                                                                                                  |
| 8.                                                       | health[tiab] OR wellbeing[tiab] OR "well being" [tiab] OR well-being[tiab] OR wellness[tiab] OR well-ness[tiab] OR illness*[tiab] OR disease*[tiab] OR disorder*[tiab] OR infection*[tiab] OR morbidit*[tiab] OR mortalit*[tiab]                                                                                                                                                                                                                                                                                                                                                                                                    |
| 9.                                                       | #7 OR #8                                                                                                                                                                                                                                                                                                                                                                                                                                                                                                                                                                                                                            |
| 10.                                                      | Canada[MeSH Terms]                                                                                                                                                                                                                                                                                                                                                                                                                                                                                                                                                                                                                  |
| 11.                                                      | Canad*[tiab] OR "British Columbia"[tiab] OR "Colombie Britannique"[tiab] OR Alberta*[tiab] OR Saskatchewan[tiab] OR Manitoba*[tiab] OR Ontario[tiab] OR Quebec[tiab] OR "Nouveau Brunswick"[tiab] OR "Nova Scotia"[tiab] OR "Nouvelle Ecosse"[tiab] OR "Prince Edward Island"[tiab] OR Newfoundland[tiab] OR Labrador[tiab] OR Nunavut[tiab] OR NWT[tiab] OR "northwest territories"[tiab] OR Yukon[tiab] OR Nunavik[tiab] OR Inuvialuit[tiab]                                                                                                                                                                                      |
| 12.                                                      | #10 OR #11                                                                                                                                                                                                                                                                                                                                                                                                                                                                                                                                                                                                                          |
| 13.                                                      | #3 AND #6 AND #9 AND #12                                                                                                                                                                                                                                                                                                                                                                                                                                                                                                                                                                                                            |
