# Supplementary material for: Immigrant child health in Canada: a scoping review
Source: PubMed Central journal article supplement — BMJ Glob Health. 2022 Apr 14;7(4):e008189. doi: 10.1136/bmjgh-2021-008189 (PMC9014022; doi:10.1136/bmjgh-2021-008189), 2022-04-14
Supplement: bmjgh-2021-008189supp003.pdf [file bmjgh-2021-008189supp003.pdf]

## Supplemental file 2: grey literature search

| Search # | Source Searched                              | Webpage/Link                                                                                                              | Date of Last Search | Search Terms                                                                                                                                      | Results           | Reviewed                                | Selected |
|----------|----------------------------------------------|---------------------------------------------------------------------------------------------------------------------------|---------------------|---------------------------------------------------------------------------------------------------------------------------------------------------|-------------------|-----------------------------------------|----------|
| #1       | Google Advanced Search                       | <a href="https://www.google.ca/advanced_search">https://www.google.ca/advanced_search</a>                                 | 14-Feb-22           | immigrant child health canada -pubmed -cinahl -scopus -socindex -sociologicalabstract<br>Limiters: English; Canada; .edu                          | 860,000           | 100                                     | 4        |
| #2       | Google Advanced Search                       | <a href="https://www.google.ca/advanced_search">https://www.google.ca/advanced_search</a>                                 | 14-Feb-22           | immigrant child health canada -pubmed -cinahl -scopus -socindex -sociologicalabstract<br>Limiters: English; Canada; .org                          | 7,333,000         | 100                                     | 4        |
| #3       | Google Advanced Search                       | <a href="https://www.google.ca/advanced_search">https://www.google.ca/advanced_search</a>                                 | 14-Feb-22           | immigrant child health canada -pubmed -cinahl -scopus -socindex -sociologicalabstract<br>Limiters: English; Canada; .gov                          | 312,000           | 100                                     | 0        |
| #4       | Google Advanced Search                       | <a href="https://www.google.ca/advanced_search">https://www.google.ca/advanced_search</a>                                 | 14-Feb-22           | immigrant child health canada -pubmed -cinahl -scopus -socindex -sociologicalabstract<br>Limiters: English; Canada; .gc.ca                        | 1,010,000         | 100                                     | 3        |
| #5       | Google Advanced Search                       | <a href="https://www.google.ca/advanced_search">https://www.google.ca/advanced_search</a>                                 | 14-Feb-22           | immigrant child health canada -pubmed -cinahl -scopus -socindex -sociologicalabstract<br>Limiters: English; Canada; .ca                           | 5,060,000         | 100                                     | 6        |
| #6       | Googe Scholar                                | <a href="https://scholar.google.com/">https://scholar.google.com/</a>                                                     | 22-Feb-22           | immigrant child health canada<br>Limiters: 1997 to now                                                                                            | 50,000            | 100                                     | 7        |
| #7       | Google Scholar                               | <a href="https://scholar.google.com/">https://scholar.google.com/</a>                                                     | 22-Feb-22           | (newcomer or refugee) and (child or youth or adolescent) and (health or wellbeing or well-being) and canada<br>Limiters: 1997 to now              | 2,490             | 100                                     | 9        |
| #8       | [Redacted] Grey Literature Collection        | [redacted]                                                                                                                | 22-Feb-22           | include all: immigrant child health                                                                                                               | 4,637             | 100                                     | 0        |
| #9       | Proquest Dissertations and Theses Global     | [redacted]                                                                                                                | 22-Feb-22           | (immigrant or newcomer or refugee) and (child or youth or adolescent) and (health or wellbeing or well-being) and canada<br>Limiters: 1997 to now | 146               | 100                                     | 4        |
| #10      | Government of Canada                         | <a href="https://www.canada.ca/en.html">https://www.canada.ca/en.html</a>                                                 | 22-Feb-22           | immigrant child health                                                                                                                            | 17,133            | 100                                     | 0        |
| #11      | Hospital for Sick Children                   | <a href="https://lab.research.sickkids.ca/task/reports-theses/">https://lab.research.sickkids.ca/task/reports-theses/</a> | 22-Feb-22           | No search function available: review of publications, reports & theses (1997 - 2021)                                                              | N/A               | 179 publications<br>31 reports & theses | 0        |
| #12      | Caring for Kids New to Canada                | <a href="https://kidsnewtocanada.ca/">https://kidsnewtocanada.ca/</a>                                                     | 22-Feb-22           | immigrant child health                                                                                                                            | 100 results shown | 100                                     | 0        |
| #13      | Women & Children's Health Research Institute | <a href="https://www.wchri.org/">https://www.wchri.org/</a>                                                               | 22-Feb-22           | immigrant child health                                                                                                                            | 318               | 100                                     | 0        |
| #14      | Caring for Newcomer Children                 | <a href="https://cmascanada.ca/">https://cmascanada.ca/</a>                                                               | 22-Feb-22           | health                                                                                                                                            | 54                | 54                                      | 0        |
